# Supplementary material for: Erector spinae plane blocks for day-case medical thoracoscopy: a pilot clinical study
Source: Pleura Peritoneum. 2022 Nov 15;7(4):187–90. doi: 10.1515/pp-2022-0115 (PMC9742453; doi:10.1515/pp-2022-0115)
Supplement: Supplementary file 1 — Supplementary Material [file j_pp-2022-0115_suppl.xlsx]

## Sheet: Procedure day
Case	Date	Patient age (yr)	Type of block (ESP/MPTP/PVB/None/Freetext)	Estimated spinal level of block	Total volume of block LA (ml)	Malignant? (Y/N)	Biopsy taken? (Y/N)	Chronic opioid use (Y/N)	Highest documented propofol Ce (#)	Any other drugs used & doses/Cpt for remi (free text)	Total dose MorEq of perioperative analgesia required (mg)	Total dose MorEq of analgesia given in recovery (mg)	Any non opioid rescue analgesia (free text)	Highest pain score in recovery (1-10)
Case	Date of procedure	Pain severity during procedure (1-10)	Pain severity after procedure before home (1-10)	Pain severity after returning home until sleep (1-10)	Functional pain scoring	Any analgesia taken? (Y/N)	Total rescue analgesia taken yesterday post discharge (MorEq)	Overall, did you feel your pain relief was effective on the day of your procedure? (Y/N)	MorEq = Oral morphine equivalent (mg)
									Fentanyl IV 67 micrograms = 10mg oral morphine
									Fentanyl IV 100 micrograms = 14.9mg oral morphine
									Codeine 100mg = 10mg oral morphine
									Codeine 30mg = 3mg oral morphine
									Morphine 5mg IV = 10mg oral morphine
									Record 0 if simple analgesia (paracetamol, ibuprofen) only
									*Functional pain scoring:
									On a scale of 0 to 10, how able were you to do the following activities, if 0 is totally unable and 10 is just as able as you were before?
									1	Strenuous activity i.e. exercise, heavy gardening
									2	Lighter activity e.g. light housework
									3	Moving around house
									4	Performing basic activities of self care e.g. washing, dressing
									5	Coughing and deep breathing
